# Supplementary material for: Deposition of Lead Phosphate by Lead-Tolerant Bacteria Isolated from Fresh Water near an Abandoned Mine
Source: MDPI journal article supplement (doi:10.3390/ijms23052483), 2022-02-24
Supplement: s1 [file s1]

Supplementary materials

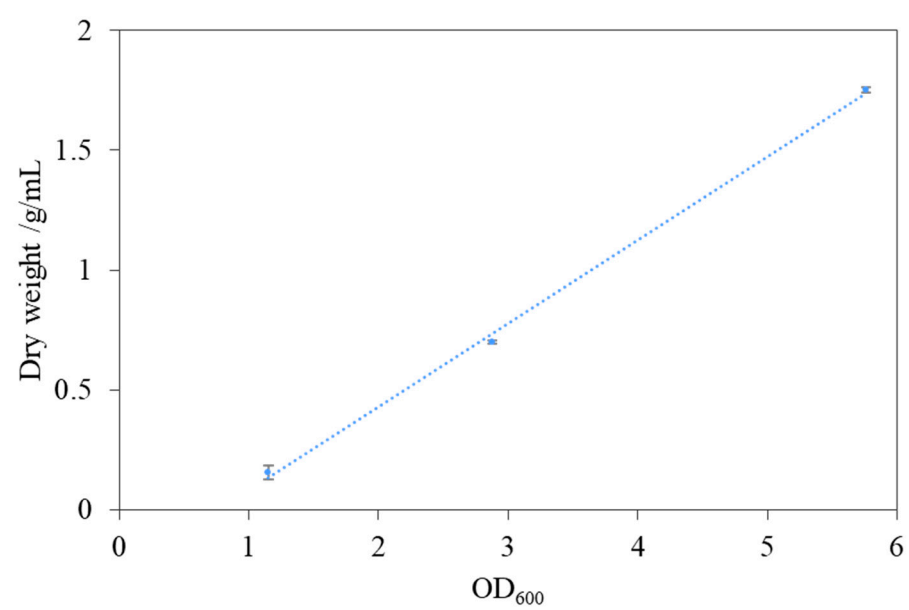

**Figure S1.** The correlation between dry weight of cells and OD<sub>600</sub>.

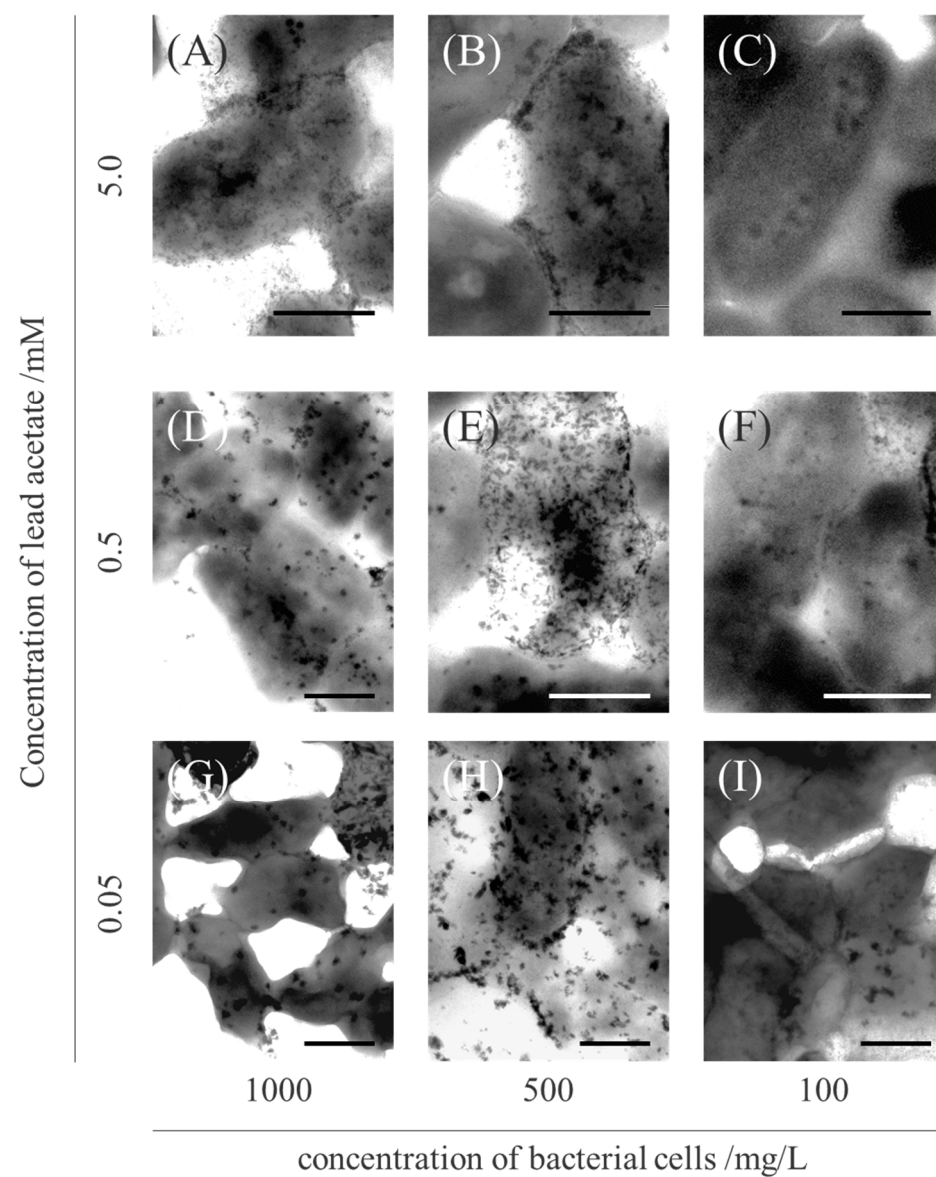

**Figure S2.** TEM images of KKY-29 incubated in various concentration of lead acetate solution. Scale bar is 500 nm.

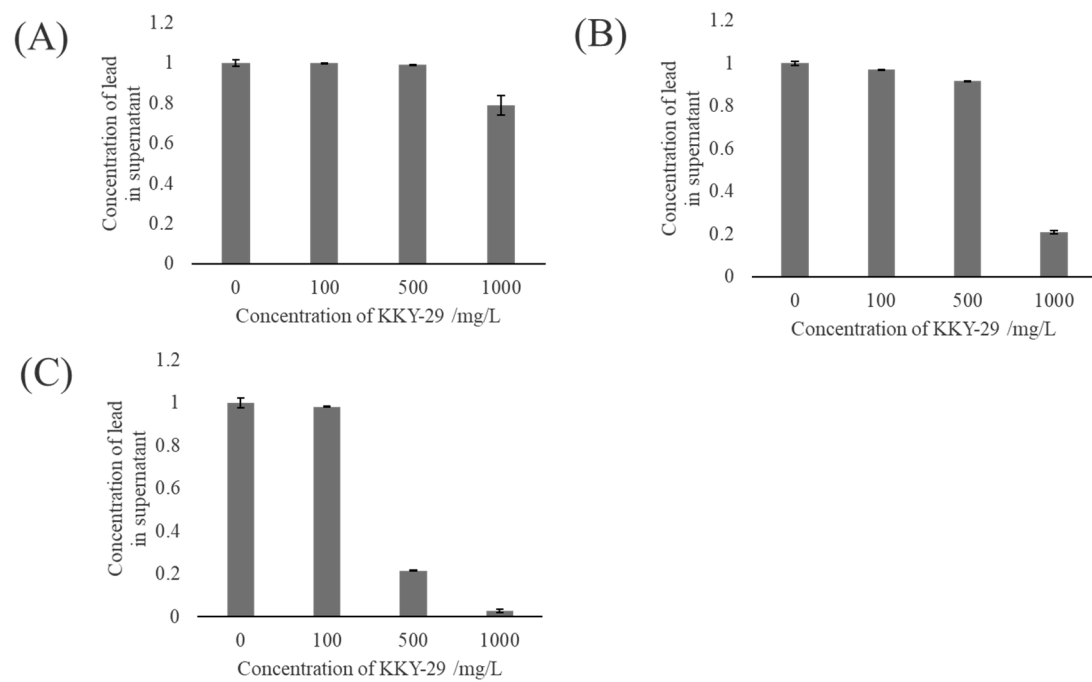

**Figure S3.** The lead concentrations of the KKY-29 treated with lead acetate solution ((A) 5.0 mM, (B) 0.5 mM, (C) 0.05 mM). The relative values are shown when the condition of no metal solution is set to 1 ( $n = 3$ , mean SD).

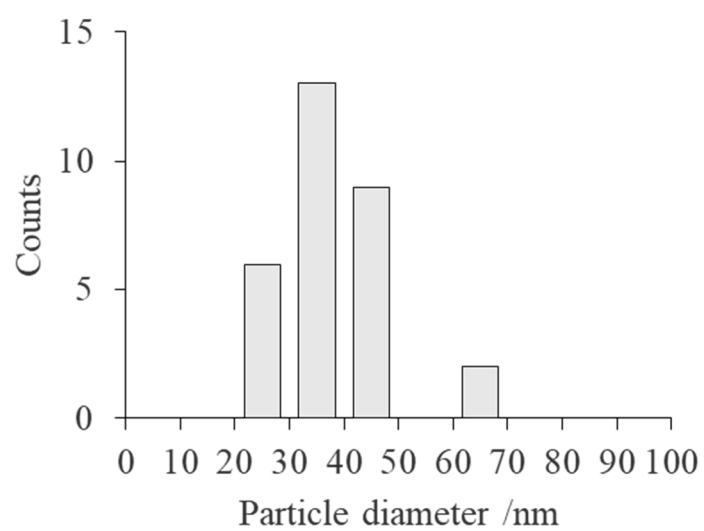

**Figure S4.** The size distribution of nanoparticles.

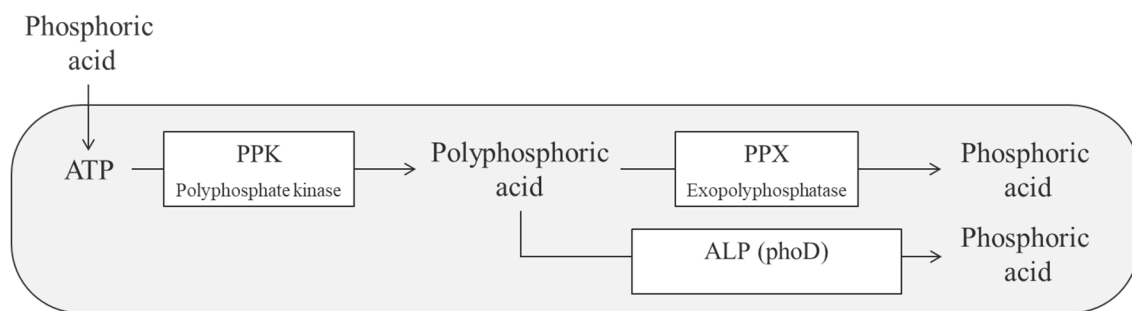

**Figure S5.** Schematic model of polyphosphoric acid decomposition pathway.

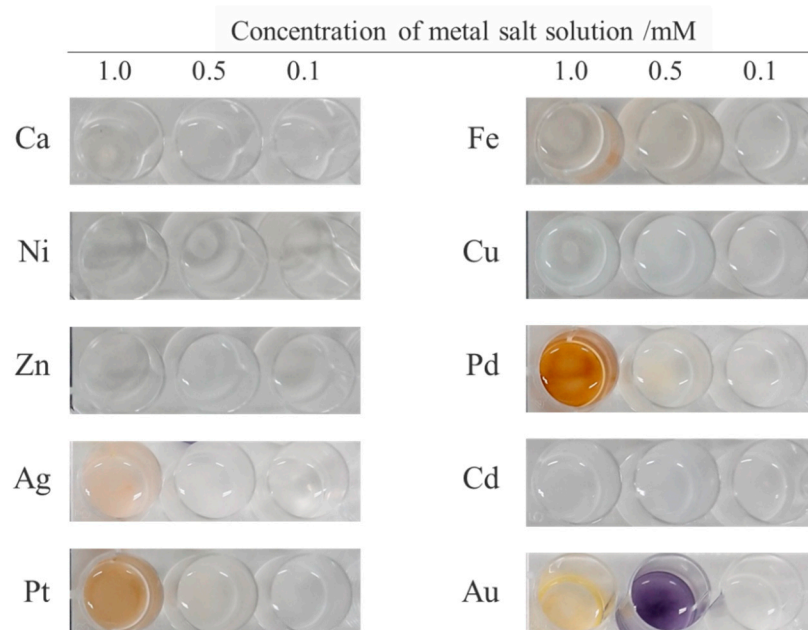

**Figure S6.** The color results of the KKY-29 suspension after incubating with various metal salt solution.

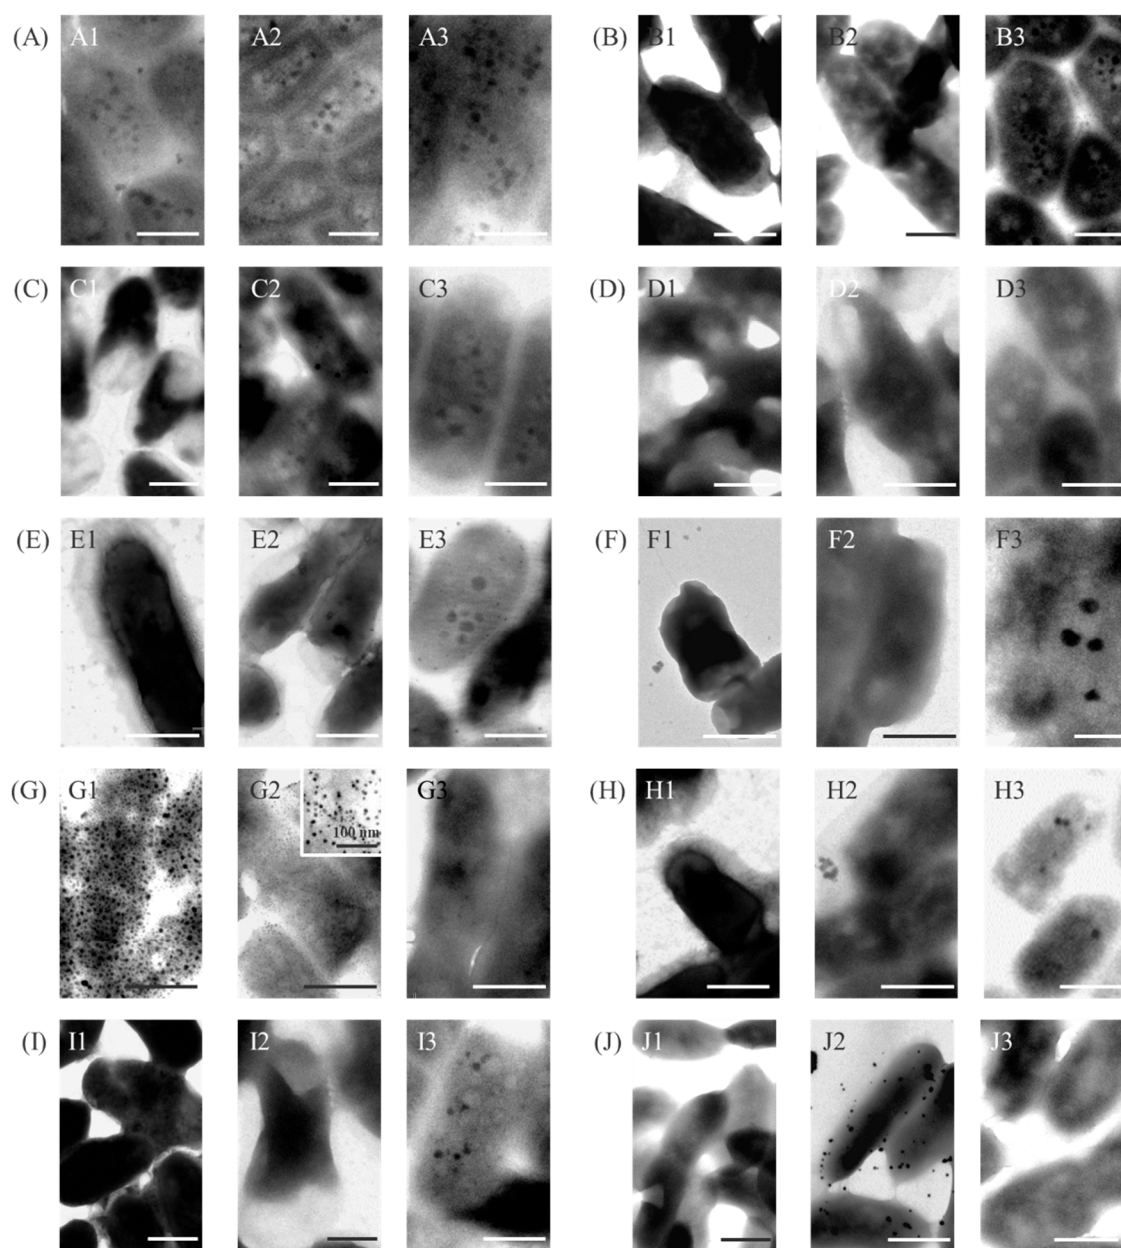

**Figure S7.** TEM images of the KKY-29 after incubating with various metal salt solution. Scale bar is 500 nm.

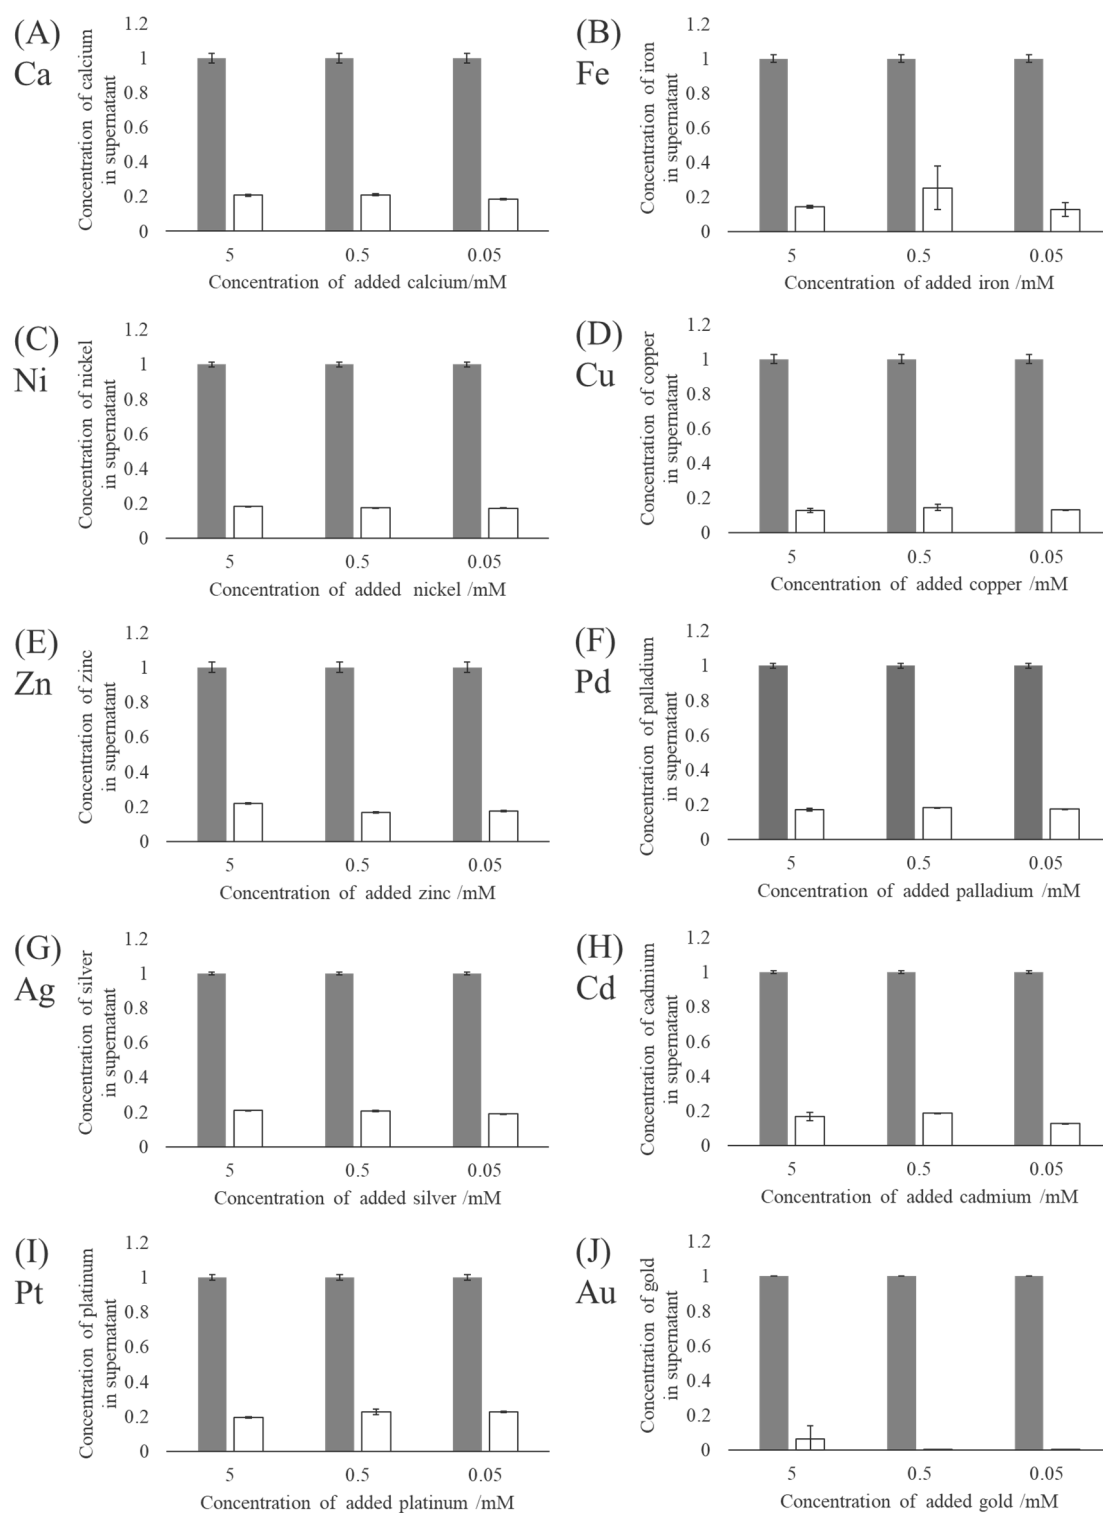

**Figure S8.** The metal concentrations of the KKY-29 treated with various metal solution ( $n = 3$ , mean SD). Closed bar means as negative control and open bar means samples with KKY-29.
